# Supplementary material for: Helicobacter pylori infection related long noncoding RNA (lncRNA) AF147447 inhibits gastric cancer proliferation and invasion by targeting MUC2 and up-regulating miR-34c
Source: PubMed Central journal article supplement (PMC5347731; doi:10.18632/oncotarget.13165), 2016-11-07
Supplement: oncotarget-07-82770-s001.pdf [file oncotarget-07-82770-s001.pdf]

# Helicobacter pylori infection related long noncoding RNA (lncRNA) AF147447 inhibits gastric cancer proliferation and invasion by targeting MUC2 and up-regulating miR-34c

## Supplementary Materials

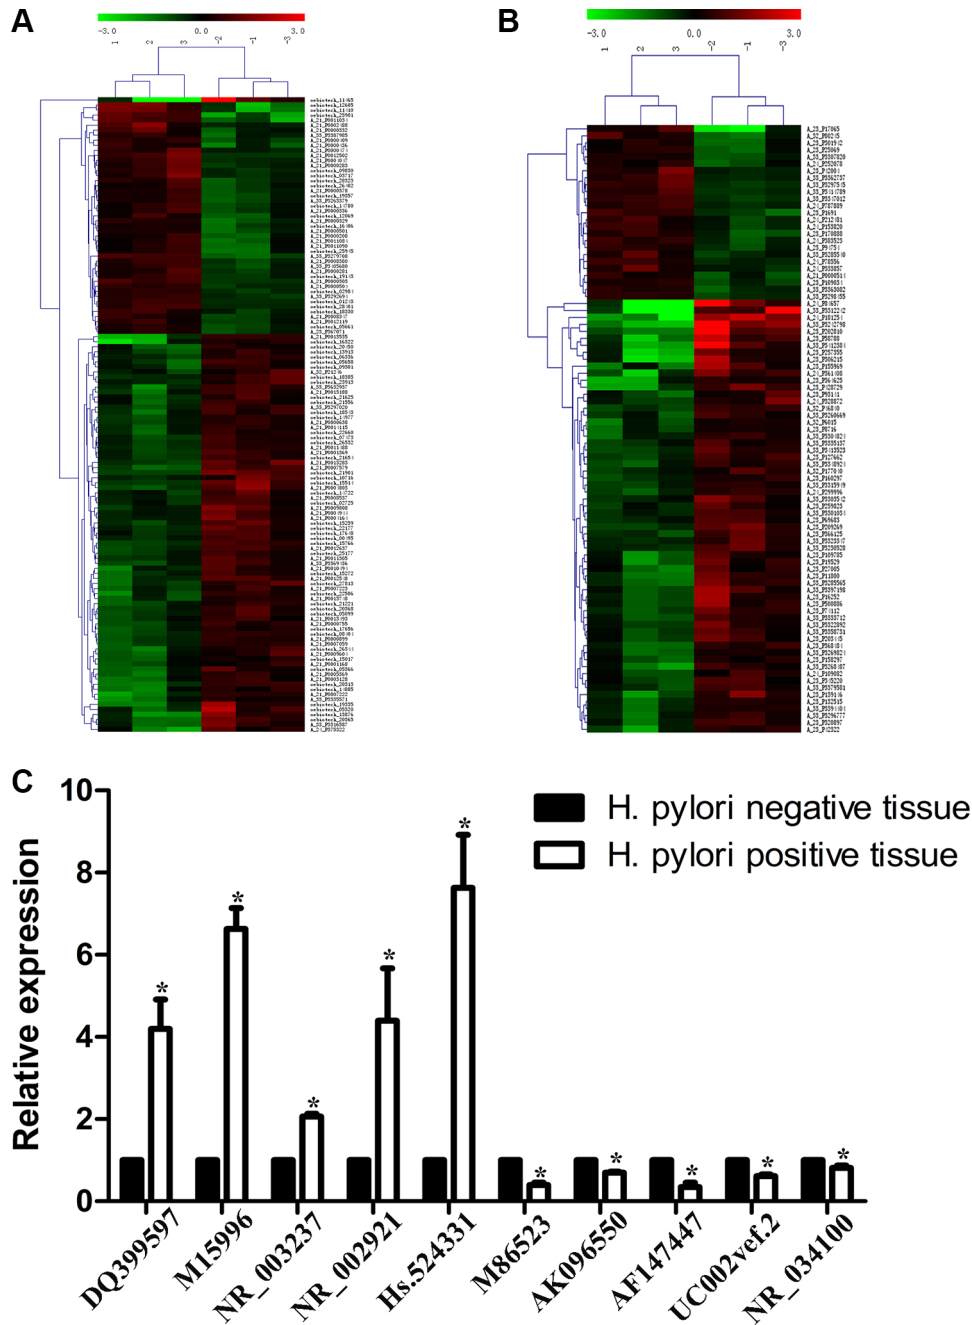

**Supplementary Figure S1: Differential expression of lncRNAs in *H. pylori* positive and negative tissues.** Hierarchical clustering analysis of 87 mRNAs (A) and 126 lncRNAs (B) that were differentially expressed between *H. pylori* positive and negative tissues. (greater than 2.0-fold;  $P < 0.05$ ). Expression values are represented in shades of red and green, indicating expression above and below the median expression value across all samples (log scale 2, from  $-0.06$  to  $+0.06$ ), respectively. (C) We validated the differential expression of 10 lncRNAs in 3 paired *H. pylori* positive and control samples using RT-PCR. (\* $p < 0.05$ ; \*\* $p < 0.01$ ).

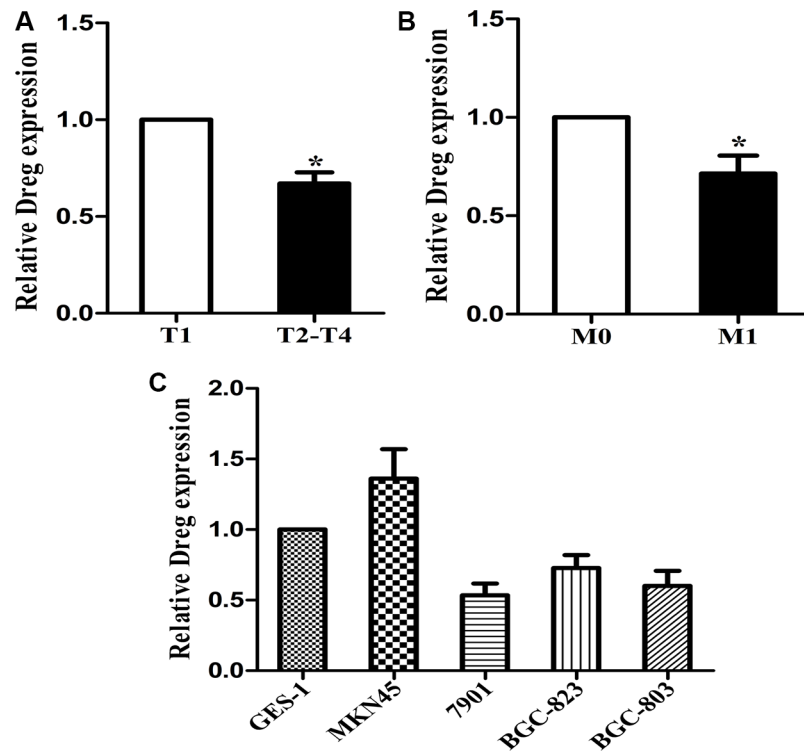

**Supplementary Figure S2: LncRNA-AF147447 expression in GC cells and tissues.** (A) LncRNA-AF147447 expression was validated by qRT-PCR in 5 different gastric epithelial cells. (B) LncRNA-AF147447 expression was examined in different GC stages in patients. (C) LncRNA-AF147447 expression was examined in different metastasis states.

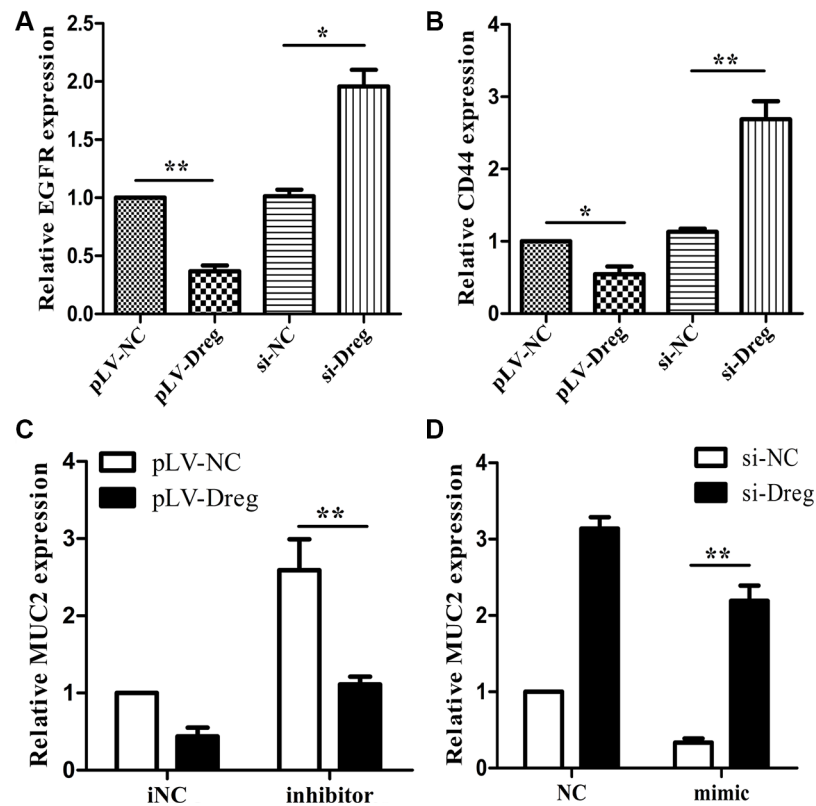

**Supplementary Figure S3: Target gene expression after transfecting with AF147447 or miR-34c.** (A) EGFR or CD44 mRNA expression after cells transfecting with pLV-AF147447 or si-AF147447. (B) MUC2 mRNA expression after cells transfecting with mimic or inhibitor with or without LncRNA AF147447. (\* $p < 0.05$ ; \*\* $p < 0.01$ ). (C) MUC2 mRNA expression was detected after co-transfect miR-34c inhibitor/iNC and PLV-AF147447/NC. (D) MUC2 mRNA expression was detected after co-transfect miR-34c mimic/NC and si-AF147447/iNC.

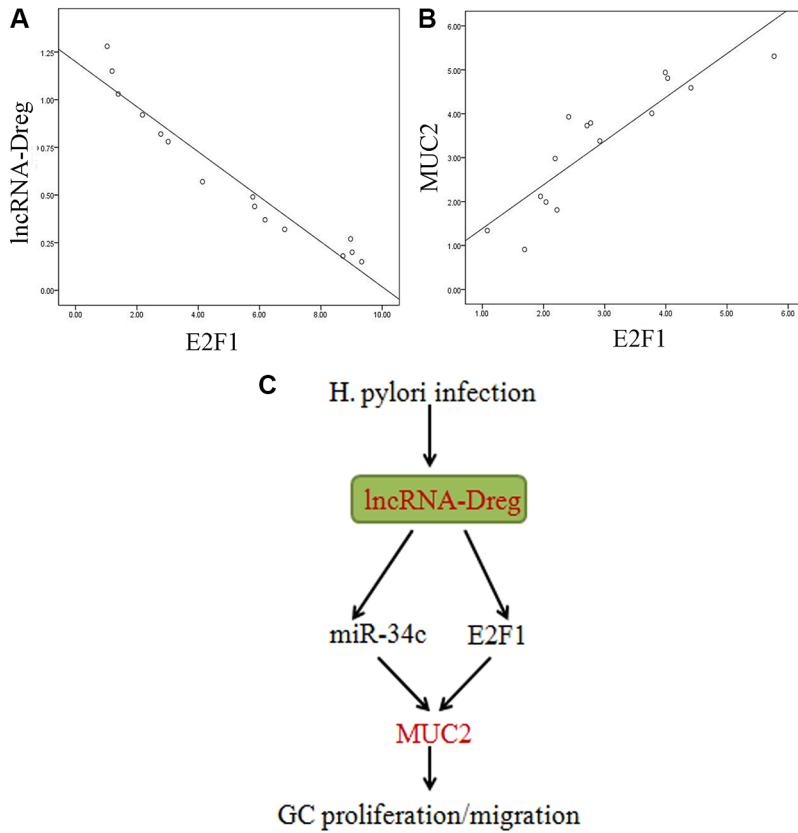

**Supplementary Figure S4: Pearson correlation.** (A) A statistically significant inverse correlation between E2F1 and IncRNA-Af147447 levels in clinical specimens. (B) A statistically significant positive correlation between E2F1 and MUC2 in clinical specimens. (C) The proposed mechanisms by which IncRNA AF147447 involved in *H. pylori*-induced GC.

**Supplementary Table S1: Clinical characteristics of the enrolled control and tumor patients**

| <b>Factor</b>    | <b>Hp (+) control</b> | <b>Hp (-) control</b> | <b>P value</b>     |
|------------------|-----------------------|-----------------------|--------------------|
| population       | 75                    | 75                    |                    |
| Gender           |                       |                       |                    |
| Male             | 41                    | 39                    | 0.435              |
| Female           | 34                    | 36                    |                    |
| Age(years)       |                       |                       |                    |
| < 40             | 31                    | 33                    | 0.434              |
| ≥ 40             | 44                    | 42                    |                    |
| Smoking History  |                       |                       |                    |
| Yes              | 33                    | 21                    | 0.03*              |
| No               | 42                    | 54                    |                    |
| Drinking History |                       |                       |                    |
| Yes              | 31                    | 35                    | 0.311              |
| No               | 44                    | 40                    |                    |
| Histology        |                       |                       |                    |
| SG               | 45                    | 54                    | 0.084 <sup>§</sup> |
| AG               | 21                    | 14                    |                    |
| IM               | 9                     | 7                     |                    |

<sup>§</sup>SG/(AG + IM).

| <b>Factor</b>                  | <b>Hp (+) tumor</b> | <b>Hp (-) tumor</b> | <b>P value</b> |
|--------------------------------|---------------------|---------------------|----------------|
| population                     | 50                  | 50                  |                |
| Gender                         |                     |                     |                |
| Male                           | 39                  | 36                  | 0.322          |
| Female                         | 11                  | 14                  |                |
| Age(years)                     |                     |                     |                |
| < 40                           | 13                  | 14                  | 0.500          |
| ≥ 40                           | 37                  | 36                  |                |
| Smoking History                |                     |                     |                |
| Yes                            | 21                  | 19                  | 0.419          |
| No                             | 29                  | 31                  |                |
| Drinking History               |                     |                     |                |
| Yes                            | 23                  | 26                  | 0.345          |
| No                             | 27                  | 24                  |                |
| Stage                          |                     |                     |                |
| T <sub>1</sub>                 | 11                  | 14                  | 0.322          |
| T <sub>2</sub> -T <sub>4</sub> | 39                  | 36                  |                |
| Metastasis                     |                     |                     |                |
| M <sub>0</sub>                 | 26                  | 28                  | 0.421          |
| M <sub>1</sub>                 | 24                  | 22                  |                |

**Supplementary Table S2: Mass spectrometry analysis of the proteins pulled down by lncRNA-AF147447**

| No | Gene symbol | Gene description                                       | Nondegenerative sequence | Relative abundance |
|----|-------------|--------------------------------------------------------|--------------------------|--------------------|
| 1  | MUC2        | mucin 2, oligomeric mucus/gel-forming [homo]           | Yes                      | 38.1%              |
| 2  | ILF2        | Interleukin enhancer-binding factor 2 [homo]           | Yes                      | 33.1%              |
| 3  | TRAP1       | TNF receptor-associated protein 1 [homo]               | Yes                      | 7.1%               |
| 4  | RPS3        | 40S ribosomal protein S3                               | No                       | 7.2%               |
| 5  | CDK2        | cyclin-dependent kinase 2                              | Yes                      | 5.9%               |
| 6  | unknown     | Unnamed protein product                                | Yes                      | 3.1%               |
| 7  | HDAC1       | histone deacetylase 1                                  | Yes                      | 3.1%               |
| 8  | ABCB1       | ATP-binding cassette, sub-family B (MDR/TAP), member 1 | No                       | 2.4%               |

**Supplementary Table S3: Sequences of primers and siRNA used in this study**

| Name                   |            | Sequences                       |
|------------------------|------------|---------------------------------|
| <b>qPCR primers</b>    |            |                                 |
| DQ399597               | Sense      | 5'-CCTGTATGACGATGGAGCCT-3'      |
|                        | Anti-sense | 5'-TGACACATTTGCGATGGGTAT-3'     |
| M15996                 | Sense      | 5'-GACCGACAAGGGATGGAC-3'        |
|                        | Anti-sense | 5'-ATTCTGAGTAACAGGAGCACAC-3'    |
| TCONS-L2-00005493      | Sense      | 5'-CAACCTGGCAGCATCTACAAATA-3'   |
|                        | Anti-sense | 5'-ATGGTGGCTCACAACCCTCT-3'      |
| Hs.524331              | Sense      | 5'-AATCTTCCTTCCCTTGAGCC-3'      |
|                        | Anti-sense | 5'-CAGGTGAATCGTTATTTATTATCCC-3' |
| ENST00000538098        | Sense      | 5'-GATACCTGACCCACTGTTCCC-3'     |
|                        | Anti-sense | 5'-ATGCCTTGGCTCATTCTTTG-3'      |
| M86523                 | Sense      | 5'-TGGGAAACTGCCATAGAAGAT-3'     |
|                        | Anti-sense | 5'-GTTGGGAGGGAAAGGGTG-3'        |
| TCONS-L2-00028472      | Sense      | 5'-CGCACATCTATTGCTCGTCC-3'      |
|                        | Anti-sense | 5'-AAGCCCACAGTTCAGCCATC-3'      |
| AF147447               | Sense      | 5'-TCCTCTAATGCGTCTTGTCTCC-3'    |
|                        | Anti-sense | 5'-CCCATACCAAACCTAACCACC-3'     |
| AK096550               | Sense      | 5'-TACAACCTCGGAGCATTCAAGC-3'    |
|                        | Anti-sense | 5'-TGTCAAGCACAGCAGCAAGC-3'      |
| uc002vef.2             | Sense      | 5'-CAGAATCAAATGCCACCACAGA-3'    |
|                        | Anti-sense | 5'-GCTAAACCAGACAAGGCTCCC-3'     |
| MUC2                   | Sense      | 5'-GAGGTGGAGCGGGACAA-3'         |
|                        | Anti-sense | 5'-GCAGGGTGCTTTCGGC-3'          |
| GAPDH                  | Sense      | 5'-TGTGTTGGCGTACAGGTCTTTG-3'    |
|                        | Anti-sense | 5'-GGGAAATCGTGCGTGACATTAAG-3'   |
| CD44                   | Sense      | 5'-CTGCCGCTTTCAGGTGTA-3'        |
|                        | Anti-sense | 5'-CATTGTGGGCAAGGTGCTATT-3'     |
| EGFR                   | Sense      | 5'-AGGCACGAGTAACAAGCTCAC-3'     |
|                        | Anti-sense | 5'-ATGAGGACATAACCAGCCACC-3'     |
| E2F1                   | Sense      | 5'-GCTAACGAACAAAGCCAGA-3'       |
|                        | Anti-sense | 5'-CCCTATTCTCATGCAAGGA-3'       |
| <b>siRNA sequences</b> |            |                                 |
| Dreg siRNA1            | Sense      | 5'-CCUCCCAGGUUCAAGUAAUTT-3'     |
|                        | Anti-sense | 5'-AUUACUUGAACCUGGGAGGTT-3'     |
| Dreg siRNA2            | Sense      | 5'-CAGGCUUGGUAACUAACAUTT-3'     |
|                        | Anti-sense | 5'-AUGUUAGUUACCAAGCCUGTT-3'     |
| Dreg siRNA3            | Sense      | 5'-GCUUCUUCUAUUCUCUCUUTT-3'     |
|                        | Anti-sense | 5'-AAGAGAGAAUAGAAGAAGCTT-3'     |
| siRNA NC               | Sense      | 5'-GUGGGCAACAUUCUUCGAATT-3'     |
|                        | Anti-sense | 5'-UUCGAAGAAUGUUGCCCACTT-3'     |

The sequence of pLV-Dreg:

TTTTTTTTTTAGAATTTATTTTTATTCTTTTCAGACCTCTCAGGGATGAACGGACATAGGCTTCTAACACTTAGGTGTGGGC  
AACATTCTTCGAAGCACCTCCCTCAAAGTGGAAAAGGCCTGGGGGCTCAGACGAGAGAAGAGAAGGCAGGGGAGA  
AGGTGGAGGTGAGGAAGGGAGGAGGGGCCAGGGCTCAGTGGGGTGTGGGGAGGGTGGGATTCCACCGGGGTT  
TGCCCATCCACAGCTCAGTGGGGGGATCTATGGAGTGTGTCTAGCAAGAGAGAGGACCCATGGCAGGCTTGTAACCTAAC  
ATCATGCAGTAGCTTCTTCTATTCTCTTATTTTTTTGGAAACGGAGTCTCGCTCTTGTGCCAGGCTGGAGTACAGT  
GGCACAATCTCAGCTCACTGCAACCTCTGCCTCCCAGGTTCAAGTAATTC.
